# Supplementary material for: Quality of Life and Healthcare Resource Use in a Real-world Patient Population with Idiopathic Pulmonary Fibrosis: The PROOF Registry
Source: PubMed Central journal article supplement — Pulm Ther. 2022 Apr 16;8(2):181–94. doi: 10.1007/s41030-022-00187-8 (PMC9098727; doi:10.1007/s41030-022-00187-8), 2022-04-16
Supplement: 41030_2022_187_MOESM1_ESM.pdf [file 41030_2022_187_MOESM1_ESM.pdf]

## Supplementary Material

### Quality of Life and Healthcare Resource Use in a Real-world Patient Population with Idiopathic Pulmonary Fibrosis: the PROOF Registry

Wim A. Wuyts<sup>1</sup>, Caroline Dahlqvist<sup>2</sup>, Hans Slabbynck<sup>3</sup>, Marc Schlessler<sup>4</sup>, Natacha Gusbin<sup>5</sup>, Christophe Compere<sup>6</sup>, Sofie Maddens<sup>7</sup>, Shemra Rizzo<sup>8</sup>, Klaus-Uwe Kirchgaessler<sup>9</sup>, Karen Bartley<sup>8</sup> and Benjamin Bondue<sup>10</sup>

<sup>1</sup>Department of Respiratory Medicine, Unit for Interstitial Lung Diseases, University Hospitals Leuven, Leuven, Belgium. E-mail: [wim.wuyts@uzleuven.be](mailto:wim.wuyts@uzleuven.be), <sup>2</sup>CHU UCL Namur Site Godinne, Yvoir, Belgium, E-mail: [caroline.dahlqvist@uclouvain.be](mailto:caroline.dahlqvist@uclouvain.be), <sup>3</sup>Department of Respiratory Medicine, ZNA Middelheim, Antwerp, Belgium. E-mail: [hans.slabbynck@zna.be](mailto:hans.slabbynck@zna.be), <sup>4</sup>Department of Respiratory Care, Hôpitaux Robert Schuman, Luxembourg City, Luxembourg. E-mail: [schlessler.m@pneumo-glacis.lu](mailto:schlessler.m@pneumo-glacis.lu), <sup>5</sup>CHR de la Citadelle, Liège, Belgium. E-mail: [natacha.gusbin@chrcitadelle.be](mailto:natacha.gusbin@chrcitadelle.be), <sup>6</sup>CHIREC Hospital, Brussels, Belgium. Email: [christophe.compere@gmail.com](mailto:christophe.compere@gmail.com), <sup>7</sup>AZ Groeninge, Kortrijk, Belgium. E-mail: [sofie.maddens@azgroeninge.be](mailto:sofie.maddens@azgroeninge.be), <sup>8</sup>Genentech, Inc., South San Francisco, CA, USA. E-mail: [rizzo.shemra@gene.com](mailto:rizzo.shemra@gene.com) and [kbartley15@gmail.com](mailto:kbartley15@gmail.com), <sup>9</sup>F. Hoffmann-La Roche, Ltd., Basel, Switzerland. E-mail: [klaus-uwe.kirchgaessler@roche.com](mailto:klaus-uwe.kirchgaessler@roche.com), <sup>10</sup>Department of Respiratory Medicine, Erasme University Hospital, Brussels, Belgium. E-mail: [benjamin.bondue@erasme.ulb.ac.be](mailto:benjamin.bondue@erasme.ulb.ac.be)

**Correspondence:** Professor Wim A. Wuyts, Department of Respiratory Medicine, University Hospitals Leuven, Herestraat 49, 3000 Leuven, Belgium. E-mail: [wim.wuyts@uzleuven.be](mailto:wim.wuyts@uzleuven.be)

**Table S1** Patient demographics and characteristics at registry inclusion

| Parameter <sup>a</sup>                                       | All patients<br>( <i>N</i> = 277) | Patients ever treated with<br>pirfenidone <sup>b</sup> |                        |
|--------------------------------------------------------------|-----------------------------------|--------------------------------------------------------|------------------------|
|                                                              |                                   | Yes<br>( <i>n</i> = 233)                               | No<br>( <i>n</i> = 44) |
| Male                                                         | 213 (76.9)                        | 181 (77.7)                                             | 32 (72.7)              |
| White                                                        | 255 (92.1)                        | 219 (94.0)                                             | 36 (81.8)              |
| Age, years, mean (SD)                                        | 69.6 (8.6)                        | 69.4 (8.5)                                             | 70.6 (8.9)             |
| Smoking status                                               |                                   |                                                        |                        |
| Never                                                        | 74 (26.7)                         | 65 (27.9)                                              | 9 (20.5)               |
| Current                                                      | 18 (6.5)                          | 15 (6.4)                                               | 3 (6.8)                |
| Former                                                       | 185 (66.8)                        | 153 (65.7)                                             | 32 (72.7)              |
| Incidence of comorbidities, mean (SD)                        | 2.5 (1.8)                         | 2.5 (1.8)                                              | 3.1 (1.8)              |
| Time since diagnosis to end of<br>enrolment, days, mean (SD) | 1284.1 (921.3)                    | 1294.5 (844.8)                                         | 1228.7 (1262.5)        |
| Previous treatment for IPF other than<br>pirfenidone         |                                   |                                                        |                        |
| Nintedanib                                                   | 9 (3.3)                           | 4 (1.7)                                                | 5 (11.4)               |
| N-acetylcysteine                                             | 68 (24.6)                         | 62 (26.6)                                              | 6 (13.6)               |
| Corticosteroids                                              | 50 (18.1)                         | 46 (19.7)                                              | 4 (9.1)                |
| Azathioprine                                                 | 3 (1.1)                           | 2 (0.9)                                                | 1 (2.3)                |
| Ambrisentan                                                  | 1 (0.4)                           | 0 (0)                                                  | 1 (2.3)                |
| Percent predicted FVC, mean (SD)                             | 80.6 (19.9)                       | 81.2 (19.0)                                            | 75.8 (26.2)            |
| Percent predicted DLco, mean (SD)                            | 46.9 (13.8)                       | 47.0 (13.2)                                            | 46.0 (18.7)            |
| Supplemental oxygen use                                      | 67 (24.2)                         | 61 (26.2)                                              | 6 (13.6)               |

*DLco* diffusing capacity of the lungs for carbon monoxide, *FVC* forced vital capacity, *IPF* idiopathic pulmonary fibrosis, *SD* standard deviation

<sup>a</sup>Data presented as *n* (%) unless otherwise stated

<sup>b</sup>Patients treated with pirfenidone at any time during follow-up in the registry (at the time of registry inclusion or after registry inclusion), for any duration of treatment

**Table S2** Univariate and multivariate associations of QoL at baseline with mortality without multiple imputation

| QoL measure         | Univariate analyses <sup>a</sup> |      |             |                 | Multivariate analyses <sup>a, b</sup> |      |             |                 |
|---------------------|----------------------------------|------|-------------|-----------------|---------------------------------------|------|-------------|-----------------|
|                     | <i>n</i>                         | HR   | 95% CI      | <i>p</i> -value | <i>n</i>                              | HR   | 95% CI      | <i>p</i> -value |
| Cough VAS           | 272                              | 1.02 | (0.97–1.07) | 0.4740          | 215                                   | 1.01 | (0.96–1.07) | 0.7239          |
| EQ-5D VAS score     | 262                              | 0.90 | (0.84–0.96) | 0.0008          | 219                                   | 0.93 | (0.85–1.02) | 0.1402          |
| SGRQ total score    | 208                              | 1.17 | (1.08–1.27) | 0.0001          | 163                                   | 1.11 | (1.00–1.23) | 0.0428          |
| SGRQ impact score   | 208                              | 1.10 | (1.03–1.18) | 0.0035          | 163                                   | 1.10 | (1.00–1.20) | 0.0446          |
| SGRQ activity score | 208                              | 1.12 | (1.04–1.20) | 0.0027          | 163                                   | 1.06 | (0.97–1.16) | 0.1727          |
| SGRQ symptoms score | 208                              | 1.14 | (1.06–1.22) | 0.0002          | 163                                   | 1.07 | (0.99–1.15) | 0.1113          |

*CI* confidence interval, *DLco* diffusing capacity of the lungs for carbon monoxide, *EQ-5D* EuroQoL-5 dimensions Health Questionnaire, *FVC* forced vital capacity, *HR* hazard ratio, *QoL* quality of life, *SGRQ* St. George's Respiratory Questionnaire, *VAS* visual analogue scale

<sup>a</sup>Data were considered missing at random and were not imputed

<sup>b</sup>Multivariate analyses adjusted for age, sex, percent predicted FVC, percent predicted DLco, smoking status and supplementary oxygen use

**Table S3** Outpatient consultations in all patients enrolled in the PROOF registry during the 24-month follow-up period<sup>a</sup>

| All patients (N = 277)                   |          |      |
|------------------------------------------|----------|------|
| Total number of outpatient consultations | 3514     |      |
|                                          | <i>n</i> | %    |
| <i>Type of provider</i>                  |          |      |
| General practitioner                     | 1513     | 43.1 |
| Other medical specialist                 | 858      | 24.4 |
| Pulmonologist                            | 763      | 21.7 |
| Nurse                                    | 254      | 7.2  |
| Other                                    | 125      | 3.6  |
| Missing                                  | 1        | 0    |
| <i>Site of care</i>                      |          |      |
| Caregiver's office/outpatient department | 3064     | 87.2 |
| Patient's home                           | 268      | 7.6  |
| Patient was hospitalised                 | 182      | 5.2  |
| <i>Related to</i>                        |          |      |
| IPF                                      | 2876     | 81.8 |
| Known comorbidity                        | 143      | 4.1  |
| New event                                | 131      | 3.7  |
| IPF treatment ADR                        | 19       | 0.5  |
| Other                                    | 345      | 9.8  |

*ADR* adverse drug reaction, *IPF* idiopathic pulmonary fibrosis

<sup>a</sup>Data were considered missing at random and were not imputed

**Table S4** Incidence of hospitalisations in all patients enrolled in the PROOF registry during the 24-month follow-up period<sup>a</sup>

|                                    | Month     |      |                                 |      |                                     |      |
|------------------------------------|-----------|------|---------------------------------|------|-------------------------------------|------|
|                                    | All       |      | Non-respiratory hospitalisation |      | Respiratory-related hospitalisation |      |
| Total number of hospitalisations   | 182       |      | 61                              |      | 121                                 |      |
|                                    | <i>n</i>  | %    | <i>n</i>                        | %    | <i>n</i>                            | %    |
| <i>Type of provider</i>            |           |      |                                 |      |                                     |      |
| Pulmonologist                      | 98        | 53.9 | 0                               | 0    | 98                                  | 81.0 |
| Other medical specialist           | 73        | 40.1 | 57                              | 93.4 | 16                                  | 13.2 |
| General practitioner               | 1         | 0.6  | 1                               | 1.6  | 0                                   | 0    |
| Nurse                              | 0         | 0    | 0                               | 0    | 0                                   | 0    |
| Other                              | 10        | 5.5  | 3                               | 4.9  | 7                                   | 5.8  |
| <i>Related to</i>                  |           |      |                                 |      |                                     |      |
| IPF                                | 95        | 52.2 | 0                               | 0    | 95                                  | 78.5 |
| New event                          | 37        | 20.3 | 26                              | 42.6 | 11                                  | 9.1  |
| Known comorbidity                  | 13        | 7.1  | 9                               | 14.8 | 4                                   | 3.3  |
| IPF treatment ADR                  | 3         | 1.7  | 1                               | 1.6  | 2                                   | 1.7  |
| Other                              | 34        | 18.7 | 25                              | 41.0 | 9                                   | 7.4  |
| <i>Number of days hospitalised</i> |           |      |                                 |      |                                     |      |
| <i>N</i>                           | 175       |      | 57                              |      | 118                                 |      |
| Mean (SD)                          | 7.4 (9.2) |      | 7.2 (9.6)                       |      | 7.5 (9.1)                           |      |
| Median (IQR)                       | 5 (3–8)   |      | 4 (2–8)                         |      | 5 (3–8)                             |      |
| Sum                                | 1288      |      | 409                             |      | 879                                 |      |

*ADR* adverse drug reaction, *IPF* idiopathic pulmonary fibrosis, *IQR* interquartile range, *SD* standard deviation

<sup>a</sup>Data were considered missing at random and were not imputed
